# Supplementary material for: Multivalent cation-modified NixSy for highly efficient and stable oxygen evolution electrocatalysis
Source: Royal Society of Chemistry journal article supplement (doi:10.1039/d4nj00669k), 2024-01-01
Supplement: d4nj00669k1.pdf [file d4nj00669k1.pdf]

## Supporting Information

### Multivalent cation-modified Ni<sub>x</sub>S<sub>y</sub> for highly efficient and stable oxygen evolution electrocatalysis

*Wei Yuan<sup>a</sup>, Jicheng Wu<sup>a</sup>, Guojian Jiang<sup>a,b,c,d,e,f,\*</sup>, Dandan Wu<sup>a,\*</sup>, Xiaowei Xu<sup>a</sup>,  
Shufang Chang<sup>a</sup>*

<sup>a</sup>School of Materials Science and Engineering, Shanghai Institute of Technology, 100 Haiquan Road, Shanghai 201418, R. P. China.

<sup>b</sup>State Key Laboratory of Urban Water Resource and Environment, Harbin Institute of Technology, Harbin 150090, P. R. China.

<sup>c</sup>State Key Laboratory of Crystal Materials, Shandong University, Jinan, Shandong, 250100, P. R. China.

<sup>d</sup>Infrared and Low Temperature Plasma Key Laboratory of Anhui Province, college of Electronic Countermeasures, NUDT, Hefei 230037, P. R. China.

<sup>e</sup>State Key Laboratory of Mineral Processing, Beijing 102628, P. R. China.

<sup>f</sup>State Key Lab Advanced Metals and Materials, Beijing 100083, P. R. China.

Corresponding author: guojianjiang@sit.edu.cn; wdan1008@163.com

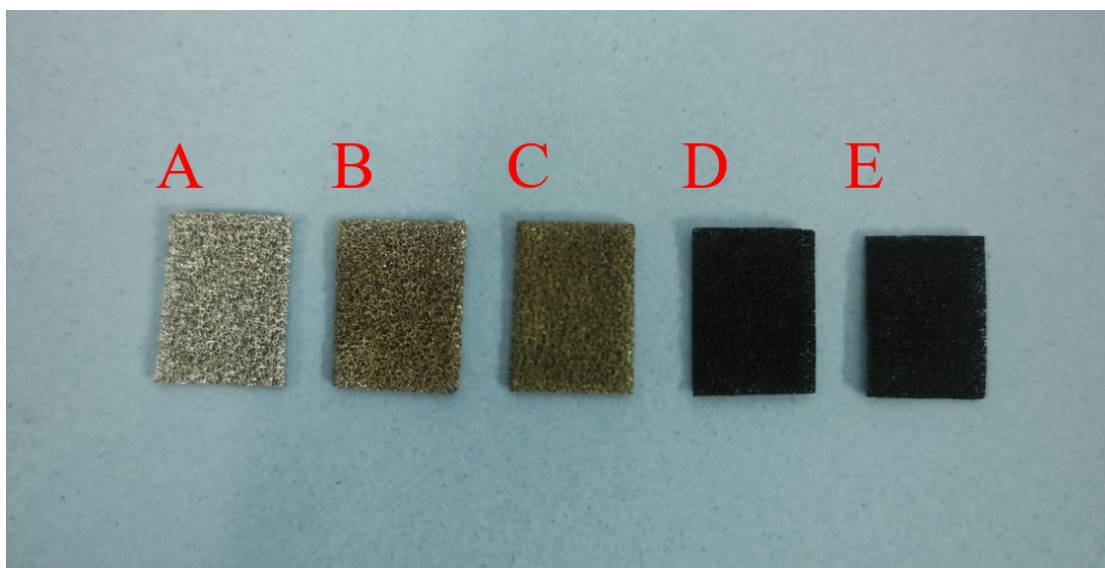

**Fig. S1** Photograph of (A) bare Ni foam (B) NiFe-LDHs (C) NiFeV-LDHs (D) (Ni, Fe)<sub>3</sub>S<sub>4</sub>-NiS and (E) (Ni, Fe, V)<sub>3</sub>S<sub>4</sub>-NiS.

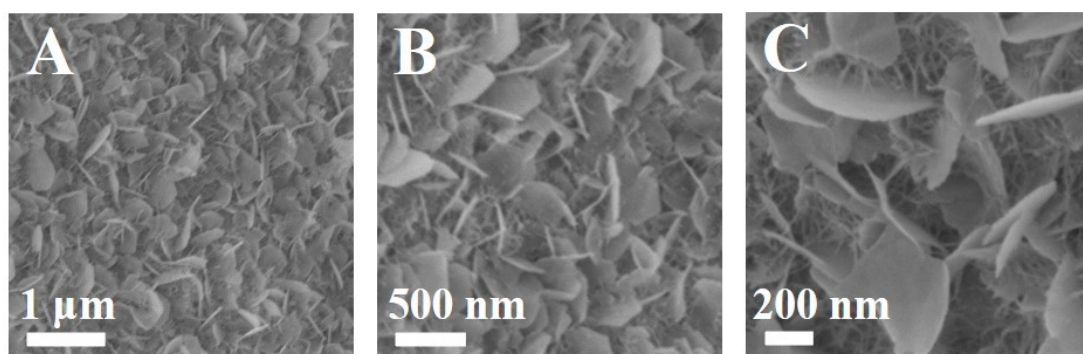

**Fig. S2** SEM images of NiFe-LDHs.

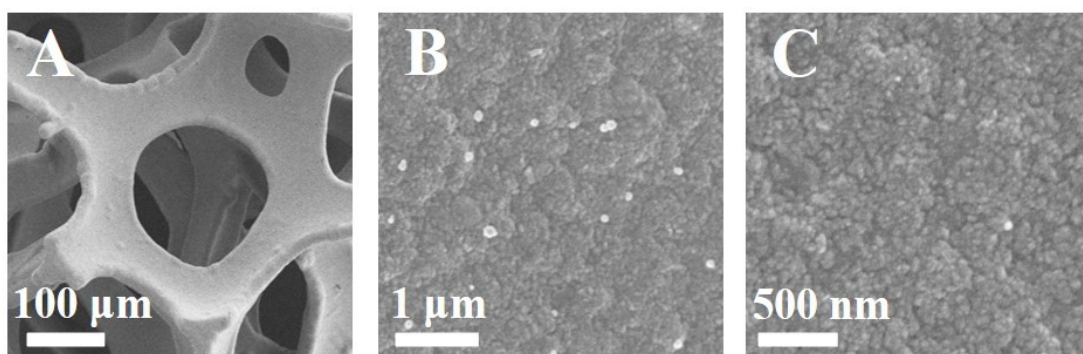

**Fig. S3** SEM images of (Ni, Fe)<sub>3</sub>S<sub>4</sub>-NiS.

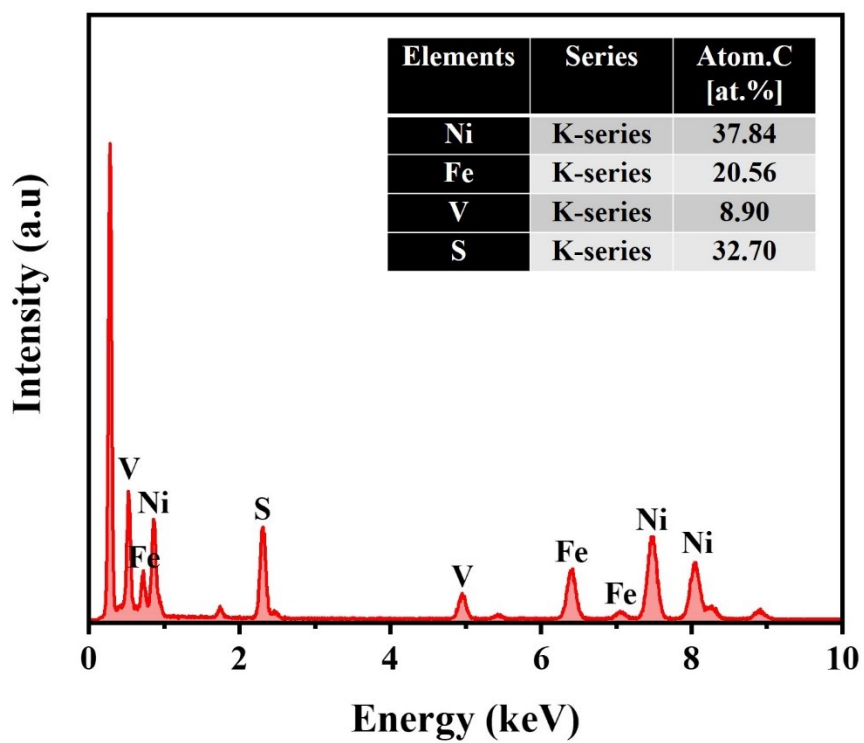

**Fig. S4** EDS pattern of  $(\text{Ni, Fe, V})_3\text{S}_4\text{-NiS}$ .

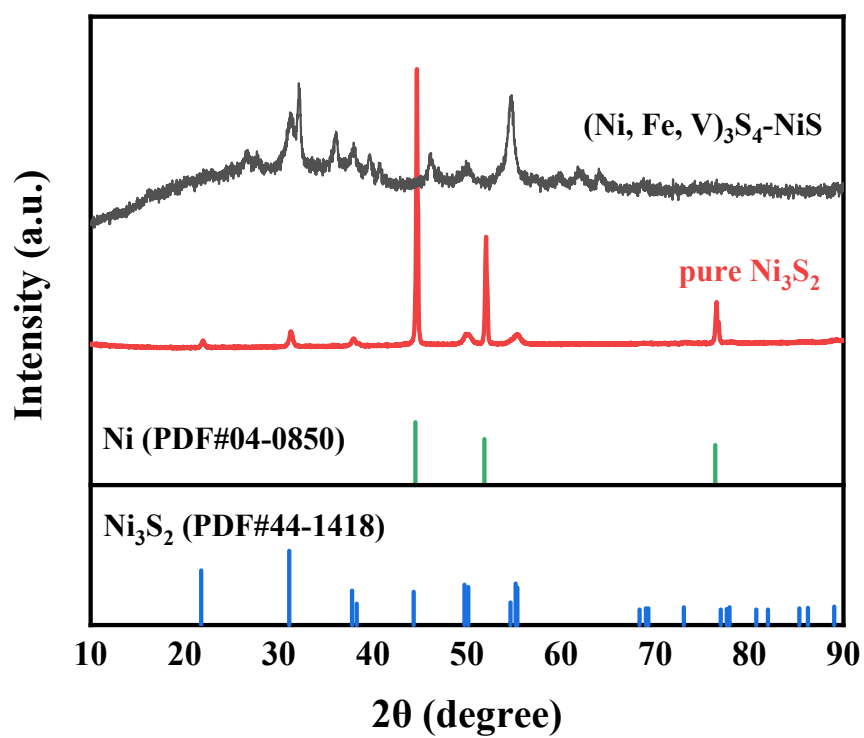

**Fig. S5** XRD pattern of (Ni, Fe, V)<sub>3</sub>S<sub>4</sub>-NiS and pure Ni<sub>3</sub>S<sub>2</sub>.

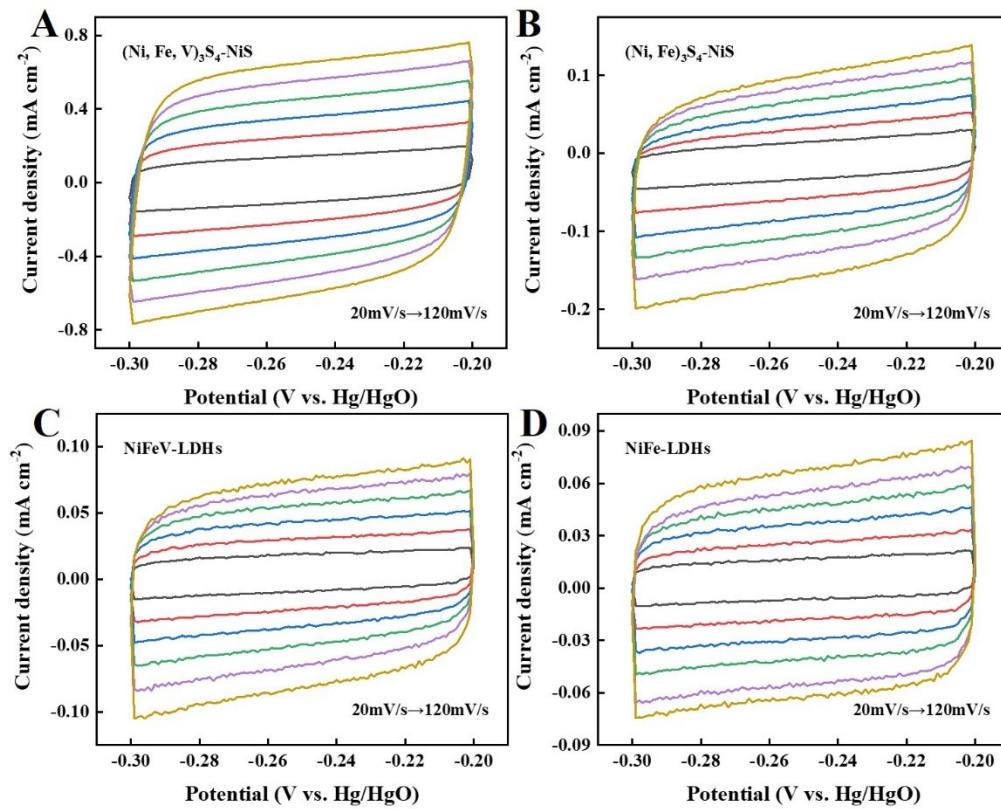

**Fig. S6** Cyclic voltammetry curves of (Ni, Fe, V)<sub>3</sub>S<sub>4</sub>-NiS (A), (Ni, Fe)<sub>3</sub>S<sub>4</sub>-NiS (B), NiFeV-LDHs (C) and NiFe-LDHs (D) at various scan rates in the region of 0.2-0.3 V vs. Hg/HgO.

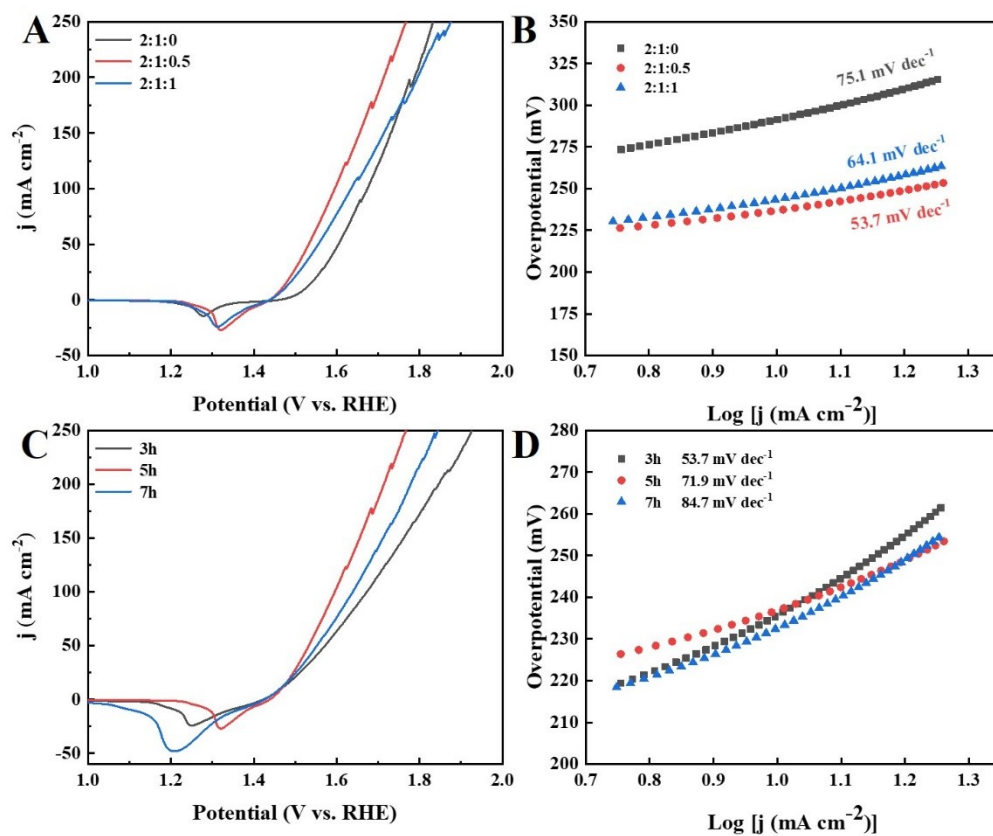

**Fig. S7** (A) Polarization curves of samples with different vulcanization ratios of Ni:Fe:V, (B) The corresponding Tafel plots of the catalysts, (C) Polarization curves of samples with different vulcanization times and (D) The corresponding Tafel plots of the catalysts.

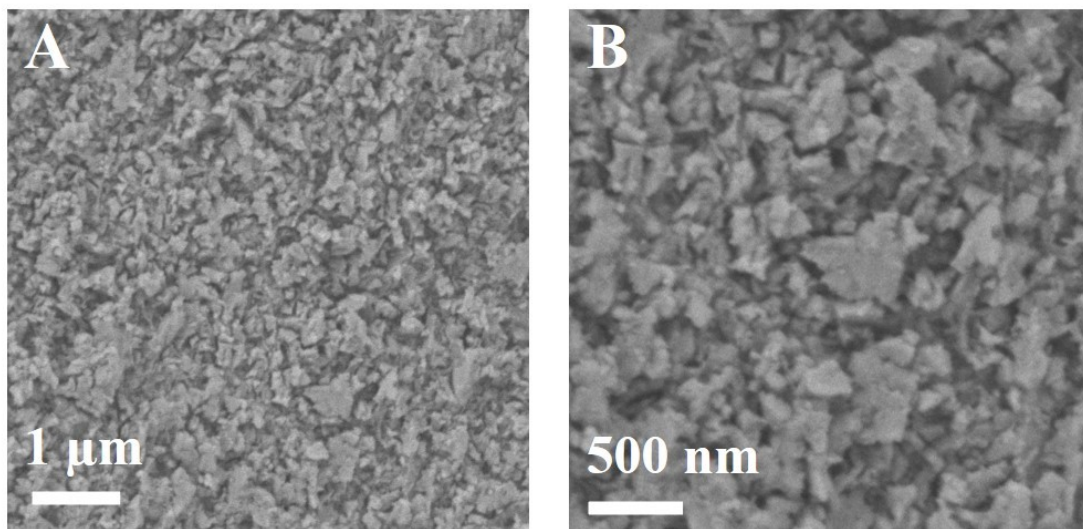

**Fig. S8** SEM images of  $(\text{Ni, Fe, V})_3\text{S}_4\text{-NiS}$  prepared by overvulcanization.

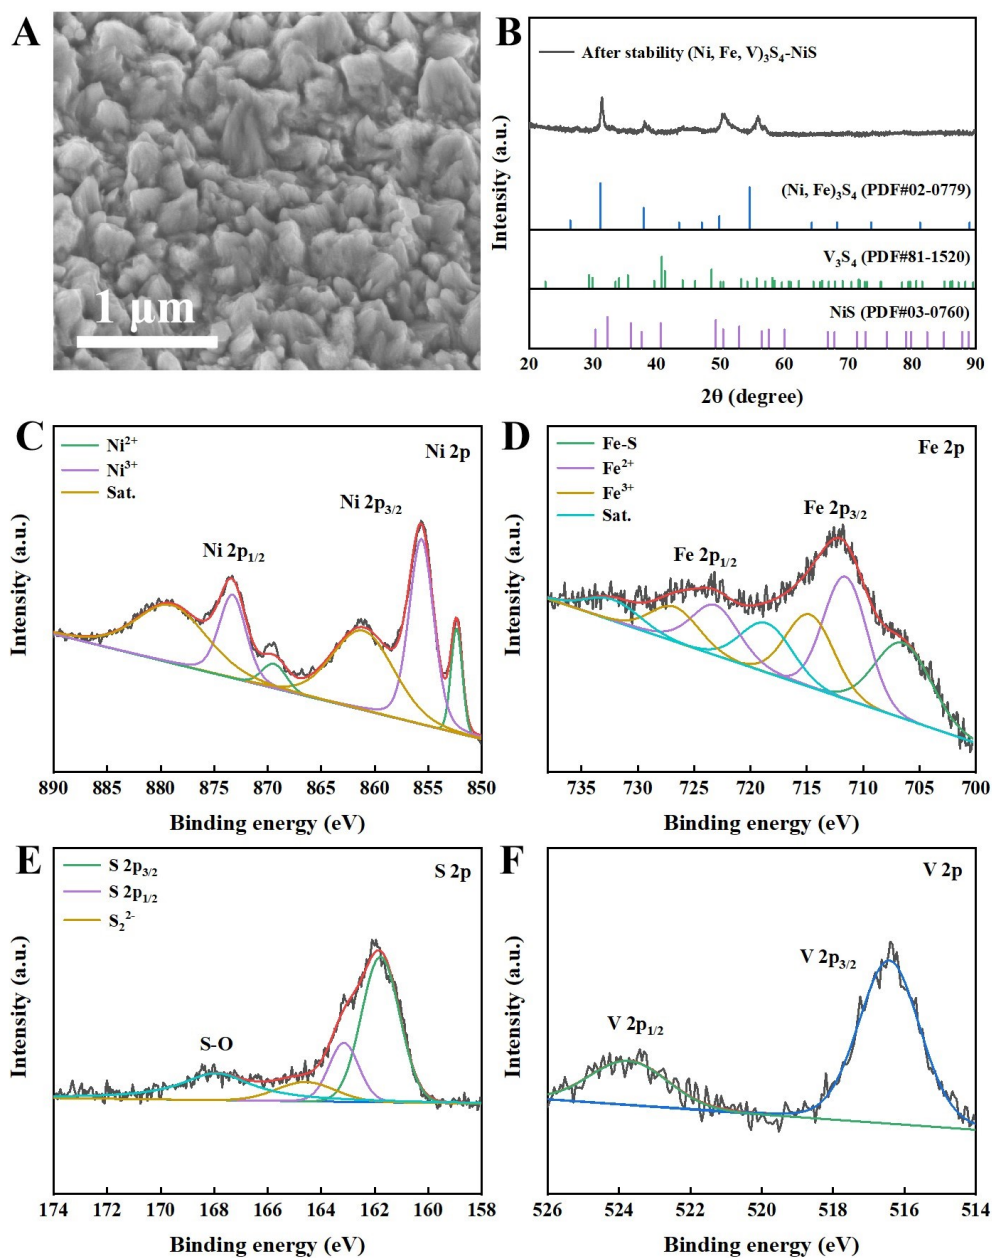

**Fig. S9** Characterization of  $(\text{Ni, Fe, V})_3\text{S}_4\text{-NiS}$  catalysts after stabilization: (A) SEM, (B) XRD and (C-F) XPS.



**Table. S1** Comparison of the electrocatalytic OER performance of the (Ni, Fe, V)<sub>3</sub>S<sub>4</sub>-NiS with other non-noble-metal catalysts recently reported in alkaline solutions.

| Catalyst                                          | Electrolyte | $\eta_{10}$ (mV) | Ref.      |
|---------------------------------------------------|-------------|------------------|-----------|
| (Ni, Fe, V) <sub>3</sub> S <sub>4</sub> -NiS      | 1M KOH      | 236              | This work |
| NiCo <sub>2</sub> S <sub>4</sub> @NiFe LDH        | 1M KOH      | 287              | [1]       |
| FeCoNi-LDH                                        | 1M KOH      | 299              | [2]       |
| CoS-Co(OH) <sub>2</sub> @aMoS <sub>2+x</sub>      | 1M KOH      | 380              | [3]       |
| Mo <sub>(1-x)</sub> W <sub>x</sub> S <sub>2</sub> | 1M KOH      | 285              | [4]       |
| CdS/Ni <sub>3</sub> S <sub>2</sub>                | 1M KOH      | 280              | [5]       |
| Ni <sub>3</sub> S <sub>4</sub> /NF                | 1M KOH      | 266              | [6]       |
| NiSe <sub>2</sub> -CoSe <sub>2</sub> /CFC         | 1M KOH      | 286              | [7]       |
| FeNi <sub>2</sub> S <sub>4</sub> NPs/rGO          | 1M KOH      | 250              | [8]       |
| pc-Ni <sub>3</sub> S <sub>2</sub> @CNF            | 1M KOH      | 270              | [9]       |
| NiS <sub>2</sub> @NS                              | 1M KOH      | 290              | [10]      |
| NM50-Ni <sub>3</sub> S <sub>4</sub>               | 1M KOH      | 257              | [11]      |
| NiCu-LDH                                          | 1M KOH      | 290              | [12]      |
| Co <sub>3</sub> O <sub>4</sub> /Co-Fe             | 1M KOH      | 297              | [13]      |
| Ni <sub>65</sub> Fe <sub>35</sub> (OOH)           | 1M KOH      | 316              | [14]      |
| Co <sub>2</sub> Fe-P                              | 1M KOH      | 303              | [15]      |
| CoMnV-LDH                                         | 1M KOH      | 270              | [16]      |

[1] X. Feng, Q. Jiao, W. Chen, Y. Dang, Z. Dai, S. Suib, J. Zhang, Y. Zhao, H. Li and C. Feng, *Appl Catal B-Environ*, 2021, 286, 119869.

[2] F. Li, Z. Sun, H. Jiang, Z. Ma, Q. Wang and F. Qu, *Energy Fuels*, 2020, 34, 11628-36.

[3] T. Yoon and K. S. Kim, *Adv Funct Mater*, 2016, 26, 7386.

[4] M. Zheng, J. Du, B. Hou and C. Xu, *ACS Appl. Mater. Interfaces*, 2017, 9, 26066–76.

[5] S. Qu, J. Huang, J. Yu, G. Chen, W. Hu, M. Yin, R. Zhang, S. Chu and C. Li,

- ACS Appl. Mater. Interfaces, 2017, 9, 29660–8.
- [6] N. Li, L. Ai, J. Jiang and S. Liu, *J Colloid Interf Sci*, 2020, 564, 418–27.
- [7] X. Zheng, X. Han, Y. Cao, Y. Zhang, D. Nordlund, J. Wang, S. Chou, H. Liu, L. Li, C. Zhong, Y. Deng and W. Hu, *Adv Mater*, 2020, 32, 2000607.
- [8] J. Jiang, Y. Zhang, X. Zhu, S. Lu, L. Long and J. Chen, *Nano Energy*, 2021, 81, 105619.
- [9] A. Tahir, T. Haq, F. Aftab, M. Zaheer, H. Duran, K. Kirchhoff, I. Lieberwirth and S. N. Arshad, *ACS Appl. Nano Mater.*, 2023, 6, 2336–45.
- [10] Y. Wang, M. Qiao, Y. Li, and S. Wang, *Small*, 2018, 14, 1800136.
- [11] K. Wan, J. Luo, C. Zhou, T. Zhang, J. Arbiol, B. Mao, X. Zhang and J. Fransaer, *Adv Funct Mater*, 2019, 29, 1900315.
- [12] Y. Zheng, J. Qiao, J. Yuan, J. Shen, A. Wang, P. Gong, X. Weng and L. Niu, *Electrochim Acta*, 2018, 282, 735–42.
- [13] X. Wang, L. Yu, B. Guan, S. Song and X. Lou, *Adv Mater*, 2018, 30, 1801211.
- [14] M. Görlin, J. Halldin Stenlid, S. Koroidov, M. Börner, M. Shipilin, A. Kalinko, V. Murzin, O. Safonova, M. Nachtegaal, A. Uheida, J. Dutta, M. Bauer, A. Nilsson and O. Diaz-Morales, *Nat commun*, 2020, 11, 6181.
- [15] L. Li, Y. Lu, X. Liu, X. Wang and S. Zhou, *J Alloy Compd*, 2022, 895, 162549.
- [16] J. Bao, Z. Wang, J. Xie, L. Xu, F. Lei, M. Guan, Y. Zhao, Y. Huang and H. Li, *Chem Commun*, 2019, 55, 3521–3524.
